# Supplementary material
Source: publisher figshare collection journal article supplement (https://sage.figshare.com/ndownloader/files/17619194)
Supplement: Supplementary file 1 [file 17619194]

**Appendix Table A1: Association of Concussions with Previous Injury History**

|                                    | Controls | Single Concussion | Multiple Concussions | p-value |
|------------------------------------|----------|-------------------|----------------------|---------|
| Athletes with Previous LE Injuries | 22       | 25                | 31                   | 0.172   |
| Number of Previous LE Injuries     | 47       | 67                | 45                   | 0.896   |

\* *P-values were calculated using chi-square and ANOVA.*

**LE:** Lower extremity

**Appendix Table A2: Odds of Sustaining Lower Extremity Injury After Concussion 2**

|                                | 90 Days |         | 365 Days |         | Entire Study |         |
|--------------------------------|---------|---------|----------|---------|--------------|---------|
|                                | OR      | p-value | OR       | p-value | OR           | p-value |
| Single vs No Concussions       | 1.000   | 1.000   | 1.100    | 0.827   | 0.920        | 0.838   |
| Multiple vs No Concussions     | 1.599   | 0.108   | 1.308    | 0.208   | 0.959        | 0.838   |
| Multiple vs Single Concussions | 2.557   | 0.108   | 1.556    | 0.296   | 1.000        | 1.000   |

\* Odds ratios and p-values calculated using univariate logistic regression.

**OR:** Odds ratio

**Appendix Table A3: Cox-Proportional Hazards Model for Previous Lower Extremity Injury**

|                |                                | 90 Days |         | 365 Days     |              | Entire Study |              |
|----------------|--------------------------------|---------|---------|--------------|--------------|--------------|--------------|
|                |                                | HR      | p-value | HR           | p-value      | HR           | p-value      |
| <b>Model 1</b> |                                |         |         |              |              |              |              |
|                | Previous LE Injury             | 1.123   | 0.803   | 1.711        | 0.052        | <b>1.566</b> | <b>0.049</b> |
|                | Number of Concussions          | 1.512   | 0.154   | <b>1.502</b> | <b>0.015</b> | <b>1.353</b> | <b>0.029</b> |
| <b>Model 2</b> |                                |         |         |              |              |              |              |
|                | Number of Previous LE Injuries | 0.980   | 0.895   | 1.077        | 0.318        | 1.074        | 0.297        |
|                | Number of Concussions          | 1.528   | 0.138   | <b>1.591</b> | <b>0.006</b> | <b>1.425</b> | <b>0.010</b> |

*\*Bolded values indicate statistical significance at  $p < 0.05$*

**HR:** Hazard ratio; **LE:** Lower Extremity

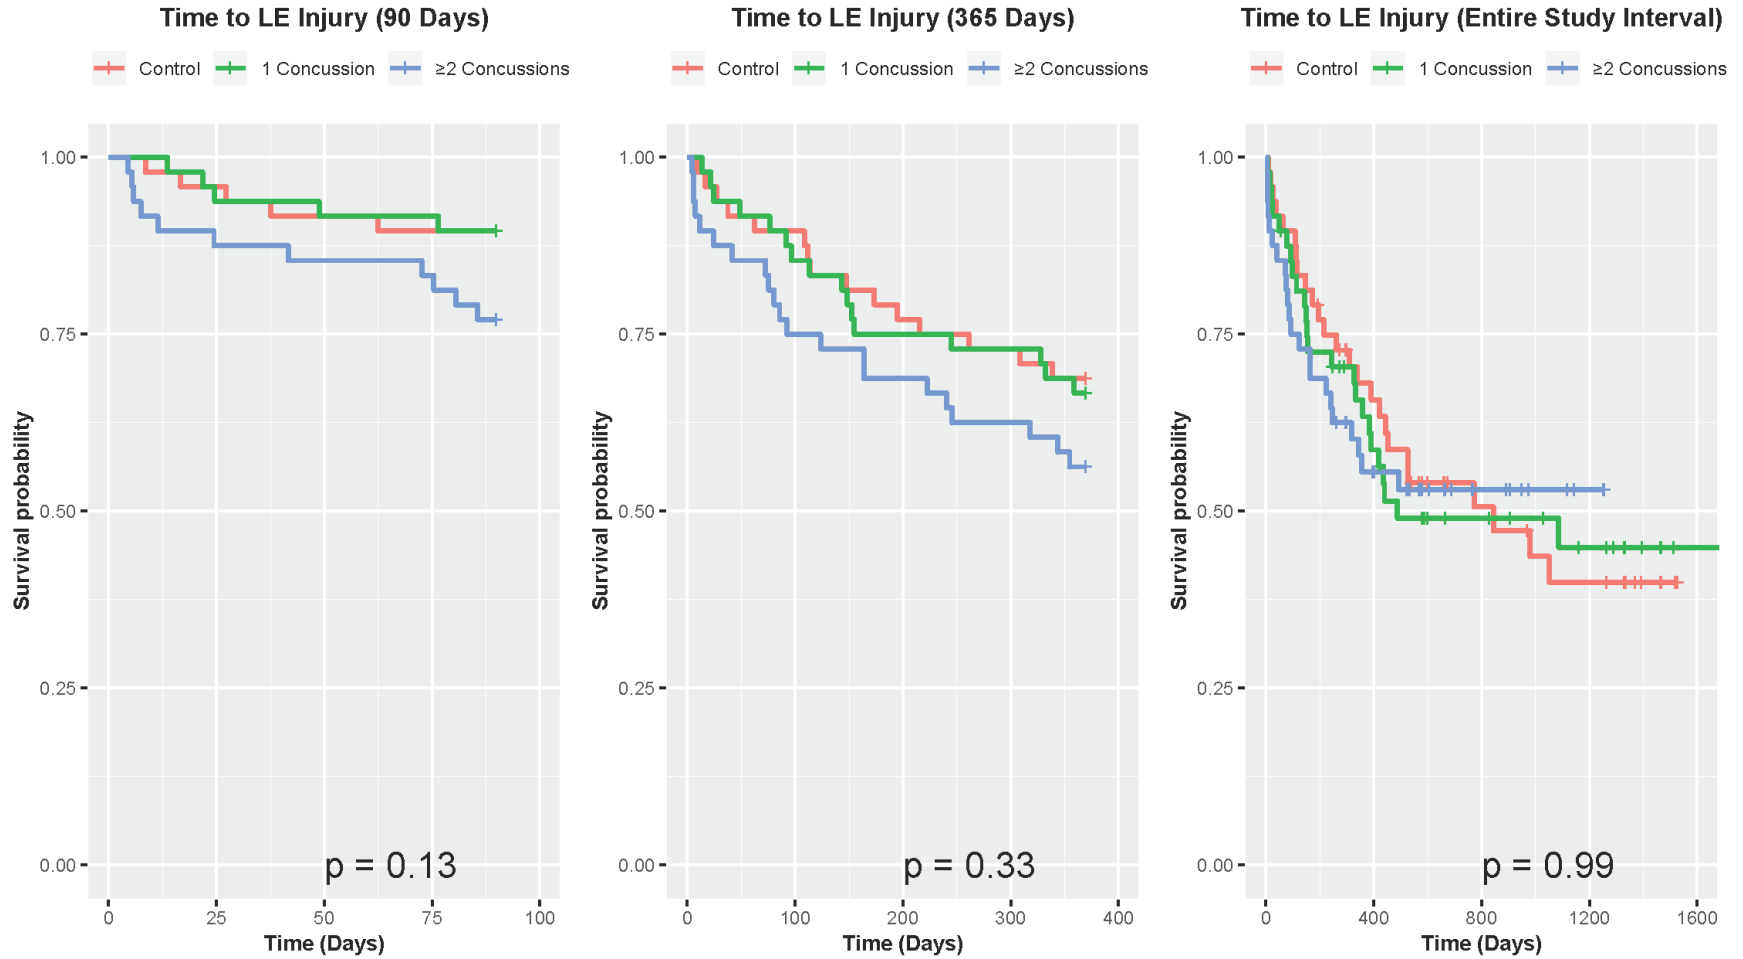

**Appendix Figure A1.** Time to lower extremity injury beginning from return to play from concussion #2.
